# Supplementary material for: Stromal ETS2 Regulates Chemokine Production and Immune Cell Recruitment during Acinar-to-Ductal Metaplasia
Source: PubMed Central journal article supplement — Neoplasia. 2016 Sep 20;18(9):541–52. doi: 10.1016/j.neo.2016.07.006 (PMC5031867; doi:10.1016/j.neo.2016.07.006), 2016-09-20
Supplement: mmc3.pdf [file mmc3.pdf]

| Subgroup                               | Gene Name       | ETS1 CHIP-Seq Peak | Receptors                    | MDSC Chemokine                        | Treg Chemokine                  | Cytotoxic T Cell Chemokine | Macrophage Chemokine      |
|----------------------------------------|-----------------|--------------------|------------------------------|---------------------------------------|---------------------------------|----------------------------|---------------------------|
| <b>Chemokine (C-C Motif) Ligands</b>   | CCL3            | Yes                | CCR1, CCR4, CCR5             | -                                     | -                               | Harlin et al.              | Trifilo et al.            |
|                                        | CCL4            | Yes                | CCR5, CCR8                   | -                                     | Bystry et al.; Schlecker et al. | Harlin et al.              | -                         |
|                                        | CCL8            | No                 | CCR1, CCR2, CCR3, CCR5, CCR8 | Fan et al.                            | -                               | -                          | -                         |
|                                        | CCL11           | No                 | CCR3, CCR5                   | -                                     | -                               | -                          | -                         |
| <b>Chemokine (C-X-C Motif) Ligands</b> | CXCL1           | No                 | CXCR2                        | Conolly et al.; Katoh et al.          | Lv et al.                       | -                          | -                         |
|                                        | CXCL2           | No                 | CXCR2                        | Katoh et al.                          | -                               | -                          | -                         |
|                                        | PF4 (CXCL4)     | Yes                | CXCR3                        | -                                     | -                               | -                          | -                         |
|                                        | CXCL5           | Yes                | CXCR2                        | Wang et al.; Toh et al.; Katoh et al. | Shi et al.                      | -                          | Balamayooran et al.       |
|                                        | PPBP (CXCL7)    | No                 | CXCR1, CXCR2                 | -                                     | -                               | -                          | Unver et al.              |
|                                        | CXCL10          | Yes                | CXCR3                        | Ding et al.                           | Santodomingo-Garzon et al.      | Harlin et al.              | Petrovic-Djergovic et al. |
|                                        | CXCL16          | No                 | CXCR6                        | -                                     | -                               | Jiang et al.               | -                         |
| <b>Interleukins</b>                    | IL1A            | Yes                | IL1R                         | -                                     | -                               | -                          | -                         |
|                                        | IL5             | Yes                | IL5R                         | -                                     | Tran et al.                     | -                          | -                         |
| <b>TNF Superfamily</b>                 | TNFSF13B (BAFF) | Yes                | TNFRSF13, TNFRSF17           | -                                     | Walters et al.                  | -                          | -                         |
|                                        | TNFSF9          | Yes                | TNFRSF9                      | -                                     | -                               | Shuford et al.             | -                         |
